# Supplementary material
Source: HighWire-hosted journal article supplement (https://rmdopen.bmj.com/content/9/1/e002767)
Supplement: inline-supplementary-material-1 [file inline-supplementary-material-1.pdf]

**Lipid management in systemic lupus erythematosus according to risk classifiers suggested by the European Society of Cardiology and disease-related risk factors reported by the EULAR recommendations**

George C. Drosos, George Konstantonis, Petros P. Sfikakis, and Maria G. Tektonidou

**Supplemental data**

## Supplementary Methods

### Study population

Two-hundred eighty-eight consecutive systemic lupus erythematosus (SLE) patients followed-up at the Rheumatology Unit's outpatient clinic were screened for enrollment in the study. After excluding patients with atherosclerotic cardiovascular disease, definite antiphospholipid syndrome, diabetes mellitus, advanced kidney disease, or pregnancy, 223 patients were invited to participate. Thirteen patients declined participation. A total of 210 patients were included in the study. Supplementary Figure S1 shows the patient selection process.

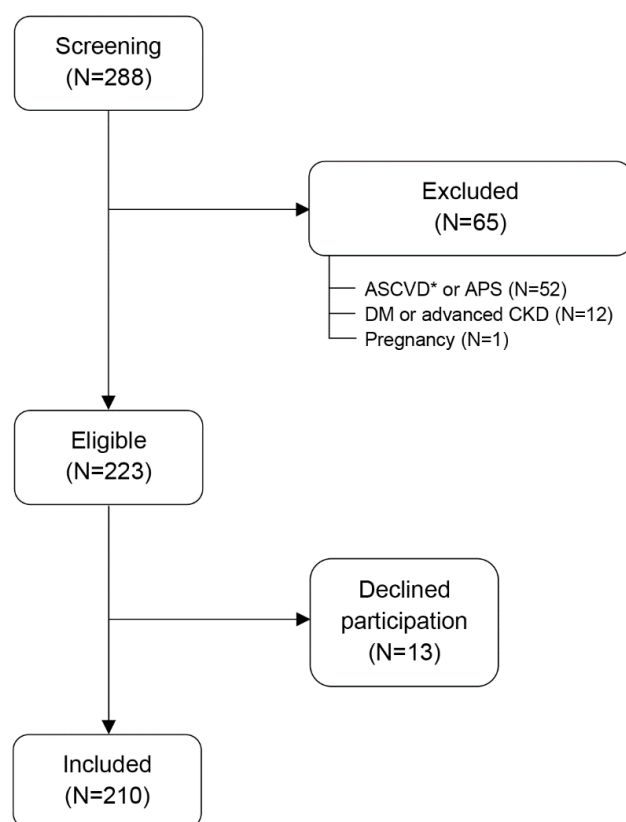

### Supplementary Figure S1

Patient selection flowchart. \*Clinically documented atherosclerotic coronary artery disease, cerebrovascular disease, or lower extremity peripheral artery disease. ASCVD, atherosclerotic cardiovascular disease; APS, antiphospholipid syndrome; DM, diabetes mellitus; CKD, chronic kidney disease.

**Supplementary Results****Supplementary Table S1**

Baseline characteristics of SLE patients (N=210)

|                                                    | Patients with<br>atherosclerotic<br>plaques (n=49) | Patients without<br>atherosclerotic<br>plaques (n=161) | p-value |
|----------------------------------------------------|----------------------------------------------------|--------------------------------------------------------|---------|
| <b>Demographics</b>                                |                                                    |                                                        |         |
| Age, years, mean (S.D.)                            | 55.9 ± 10.1                                        | 41.5 ± 10.4                                            | <0.001  |
| Women, %                                           | 91.8                                               | 93.8                                                   | 0.631   |
| <b>Traditional cardiovascular risk factors</b>     |                                                    |                                                        |         |
| Systolic blood pressure, mm Hg, median (IQR)       | 123 (117–133)                                      | 115 (107–123)                                          | <0.001  |
| Diastolic blood pressure, mm Hg, median (IQR)      | 77 (69–82)                                         | 73 (67–79)                                             | 0.095   |
| Total cholesterol, mg/dL, median (IQR)             | 200 (169–226)                                      | 178 (154–206)                                          | 0.005   |
| LDL-cholesterol, mg/dL, median (IQR)               | 113 (94–142)                                       | 103 (85–125)                                           | 0.019   |
| HDL-cholesterol, mg/dL, median (IQR)               | 61 (45–71)                                         | 57.5 (49–68.4)                                         | 0.868   |
| Triglycerides, mg/dL, median (IQR)                 | 108 (74–142)                                       | 79 (57–114)                                            | 0.003   |
| Smoking, current, %                                | 53.1                                               | 35.4                                                   | 0.027   |
| BMI, kg/m <sup>2</sup> , median (IQR)              | 26.4 (23.4–29)                                     | 23.7 (21.1–28.1)                                       | 0.021   |
| <b>SCORE class</b>                                 |                                                    |                                                        |         |
| Low risk, %                                        | 32.7                                               | 83.9                                                   | <0.001  |
| Moderate risk, %                                   | 46.9                                               | 12.4                                                   | <0.001  |
| High risk, %                                       | 20.4                                               | 3.7                                                    | 0.001   |
| Very-high risk, %                                  | 0                                                  | 0                                                      | –       |
| <b>Disease-related cardiovascular risk factors</b> |                                                    |                                                        |         |
| Disease duration, years, median (IQR)              | 10 (4–16)                                          | 6 (2–12)                                               | 0.009   |
| SLEDAI-2K, median (IQR)                            | 2 (0–4)                                            | 2 (0–4)                                                | 0.938   |
| LLDAS, %                                           | 68.6                                               | 64.7                                                   | 0.672   |
| Glucocorticoids, cumulative dose, g, median (IQR)  | 11.4 (1.3–20.7)                                    | 4.9 (0.5–13.3)                                         | 0.032   |
| Antiphospholipid antibody positivity, %            | 20.4                                               | 18                                                     | 0.706   |
| <b>Medications, current use</b>                    |                                                    |                                                        |         |
| Statins, %                                         | 16.3                                               | 8.1                                                    | 0.092   |

|                                                    |      |      |       |
|----------------------------------------------------|------|------|-------|
| Antihypertensives, %                               | 46.9 | 25.5 | 0.004 |
| Antiplatelets, %                                   | 18.4 | 22.4 | 0.551 |
| Glucocorticoids, %                                 | 63.3 | 50.9 | 0.129 |
| Hydroxychloroquine, %                              | 83.7 | 83.9 | 0.976 |
| Immunosuppressants, %                              | 42.9 | 39.1 | 0.641 |
| Ultrasound evidence of subclinical atherosclerosis |      |      |       |
| Carotid plaques, isolated, %                       | 38.8 | –    | –     |
| Femoral plaques, isolated, %                       | 16.3 | –    | –     |
| Carotid and femoral plaques, %                     | 44.9 | –    | –     |

---

SLE, systemic lupus erythematosus; BMI, body mass index; SCORE: Systematic Coronary Risk Evaluation;

SLEDAI-2k: Systemic Lupus Erythematosus Disease Activity Index-2000.

**Supplementary Table S2**

Optimal cut-off and performance characteristics of cumulative glucocorticoid dose to predict the presence of atherosclerotic plaques in SLE patients at low and moderate SCORE risk not receiving lipid-lowering therapy (N=174)

|                                       |                  |
|---------------------------------------|------------------|
| Optimal cut-off                       | ≥11 g            |
| Performance measures                  |                  |
| AUC (95% CI)                          | 0.65 (0.57–0.72) |
| Sensitivity, % (95% CI)               | 62.5 (43.7–78.9) |
| Specificity, % (95% CI)               | 64 (42.5–82)     |
| Positive predictive value, % (95% CI) | 73.9 (65.9–80.9) |
| Negative predictive value, % (95% CI) | 72.5 (64.6–79.5) |

SLE, systemic lupus erythematosus; SCORE, Systematic Coronary Risk Evaluation; AUC, area under the curve.

**Supplementary Table S3**

Multivariate analysis of disease-related cardiovascular risk classifiers for the presence of atherosclerotic plaques in patients with systemic lupus erythematosus at low or moderate SCORE class not receiving lipid-lowering treatment (N=174)

|                                      | Carotid plaque    |         | Carotid or femoral plaque |         |
|--------------------------------------|-------------------|---------|---------------------------|---------|
|                                      | OR (95% CI)*      | p-value | OR (95% CI)*              | p-value |
| Disease duration ≥10 years           | 0.41 (0.08–2.07)  | 0.281   | 0.73 (0.17–3.15)          | 0.670   |
| Cumulative glucocorticoid dose ≥11 g | 4.73 (1.09–20.47) | 0.038   | 4.80 (1.12–20.62)         | 0.035   |
| Failure to achieve LLDAS             | 1.32 (0.32–5.35)  | 0.700   | 0.75 (0.19–2.94)          | 0.680   |
| aPL positivity                       | 0.73 (0.11–4.72)  | 0.741   | 1.17 (0.19–7.10)          | 0.866   |

\*After adjusting for SCORE variables, i.e. age ( $p < 0.001$ ), gender (not significant), systolic blood pressure (not significant), total cholesterol (not significant), and current smoking ( $p = 0.007$  for carotid plaques and  $0.009$  for carotid or femoral plaques).

SCORE, Systematic Coronary Risk Evaluation; LLDAS, lupus low disease activity state; aPL, antiphospholipid antibodies.
